# Supplementary material for: C10H6NO2Cd(NO3)·2H2O: a birefringent crystal with an enlarged band-gap derived from covalent edge-sharing connection
Source: Royal Society of Chemistry journal article supplement (doi:10.1039/d3dt00688c), 2023-01-01
Supplement: d3dt00688c1.pdf [file d3dt00688c1.pdf]

# Electronic Supplementary Information

## **C<sub>10</sub>H<sub>6</sub>NO<sub>2</sub>Cd(NO<sub>3</sub>)·2H<sub>2</sub>O: A Birefringent Crystal with Enlarged Band-Gap Derived from the Covalent Edge-Sharing Connection**

*Yu Wang,<sup>a</sup> Yaoguo Shen,<sup>\*a</sup> Weiqi Huang,<sup>b</sup> Sangen Zhao<sup>\*b</sup>*

<sup>a</sup>College of Physics and Electronic Information Engineering, Minjiang University, Fuzhou, Fujian 350108, China

<sup>b</sup>State Key Laboratory of Structural Chemistry, Fujian Institute of Research on the Structure of Matter, Chinese Academy of Sciences, Fuzhou, Fujian 350002, China

\*Email: zhaosangen@fjirsm.ac.cn (S. Zhao)

\*Email: shenyg@mju.edu.cn (Y. Shen)

### Contents

|                                                                                                                       |     |
|-----------------------------------------------------------------------------------------------------------------------|-----|
| Reagents .....                                                                                                        | S2  |
| Synthesis of C <sub>10</sub> H <sub>6</sub> NO <sub>2</sub> Cd(NO <sub>3</sub> )·2H <sub>2</sub> O ( <b>1</b> ) ..... | S2  |
| Single-Crystal Structure Determination.....                                                                           | S2  |
| Thermal Stability Analysis.....                                                                                       | S2  |
| UV/Vis/NIR Diffuse Reflectance Spectroscopy .....                                                                     | S2  |
| Infrared Spectroscopy .....                                                                                           | S2  |
| Birefringence Measurements .....                                                                                      | S3  |
| Computational Methods.....                                                                                            | S3  |
| Fig. S1. Crystal structure and hydrogen bond connection of <b>1</b> .....                                             | S4  |
| Fig. S2. Thermal stability analysis for <b>1</b> .....                                                                | S4  |
| Fig. S3. Infrared spectrum of <b>1</b> .....                                                                          | S4  |
| Fig. S4. Electronic band structure for <b>1</b> .....                                                                 | S5  |
| Fig. S5. The crystal thickness of <b>1</b> .....                                                                      | S5  |
| Table S1. Crystal Data and Structural Refinement for <b>1</b> .....                                                   | S6  |
| Table S2. Atomic Coordinates and Equivalent Isotropic Displacement Parameters.....                                    | S7  |
| Table S3. Anisotropic Displacement Parameters.....                                                                    | S8  |
| Table S4. Bond Lengths for <b>1</b> .....                                                                             | S9  |
| Table S5. Bond Angles for <b>1</b> .....                                                                              | S9  |
| Table S6. Hydrogen Bonds for <b>1</b> .....                                                                           | S10 |
| References.....                                                                                                       | S11 |

## Reagents

$\text{Cd}(\text{NO}_3)_2 \cdot 4\text{H}_2\text{O}$  (99%) and  $\text{C}_{10}\text{H}_7\text{NO}_2$  (98%) were purchased from Aladdin and used as received.

## Synthesis of $\text{C}_{10}\text{H}_6\text{NO}_2\text{Cd}(\text{NO}_3)_2 \cdot 2\text{H}_2\text{O}$ (**1**)

Polycrystalline samples of **1** were synthesized by a simple evaporation technique of aqueous solution. The raw reactants of  $\text{Cd}(\text{NO}_3)_2 \cdot 4\text{H}_2\text{O}$  (2.500 g, 10 mmol) and  $\text{C}_{10}\text{H}_7\text{NO}_2$  (0.030 g, 0.2 mmol) were mixed together with deionized water (10 mL) in a plastic beaker. The solution is heated and stirred with a magnetic stirrer for 30 minutes to get a clear liquid. The beaker was sealed with perforated plastic wrap and left to stand at 25 °C for about days. Colorless lamellar crystals were obtained at the bottom of beaker. The purity of the obtained product is confirmed by the powder X-ray diffraction (XRD) patterns, which were taken on a Rigaku MiniFlex II diffractometer (Cu  $K\alpha$  radiation) in the range of  $2\theta = 5^\circ\text{--}70^\circ$  with a step width of  $0.01^\circ$  and a sampling rate of  $1^\circ \text{min}^{-1}$ . The results agree well with the calculated XRD patterns from single-crystal XRD analyses (Fig. 2a).

## Single-Crystal Structure Determination

A colorless **1** crystal ( $0.06 \times 0.03 \times 0.03 \text{ mm}^3$ ) was selected using an optical microscope for single-crystal XRD analysis. The diffraction data were collected by using graphite-monochromatized Mo  $K\alpha$  radiation ( $\lambda = 0.71073 \text{ \AA}$ ) at 293 (2) K on an XtaLAB Pro II AFC12 equipped with a Hybrid Pixel Array Detector. The collection of the intensity data, cell refinement, and data reduction were carried out with the program CrysAlisPro.<sup>1</sup> Using Olex2,<sup>2,3</sup> the structure was solved with SHELXT structure solution program using Intrinsic Phasing and refined with the SHELXL<sup>4</sup> refinement package using Least Squares minimisation. Details of crystal parameters, data collection, and structure refinement are summarized in Table S1. The atomic coordinates and equivalent isotropic displacement parameters are listed in Table S2, and the anisotropic displacement parameters are listed in Table S3. The selected bond distances and angles are presented in Tables S4–S5. Hydrogen Bonds are listed in Table S6.

## Thermal Stability Analysis

The thermogravimetric (TG) and differential scanning calorimetric (DSC) of **1** was carried out on a NETZSCH STA 449F3 simultaneous analyzer. About 9.4 mg of **1** was placed in  $\text{Al}_2\text{O}_3$  crucibles, heated at a rate of  $20^\circ\text{C min}^{-1}$  from room temperature to  $600^\circ\text{C}$  under flowing nitrogen.

## UV-Vis-NIR Diffuse Reflectance Spectroscopy

The UV/Vis/NIR diffuse reflection data were collected on a PerkinElmer Lambda-1050 UV/vis/NIR spectrophotometer. A whiteboard provided by the merchant was used as a reference (100% reflectance) in the range from 200 nm to 800 nm.

## Infrared Spectroscopy

Infrared spectrum was measured on a Nicolet iS50FT-IR spectrometer with KBr pellets as a standard in the range of  $4000\text{--}400 \text{ cm}^{-1}$ . The mixture of **1** and dried KBr (mass ratio = 1:100) was ground thoroughly in an agate mortar, and then pressed into a thin slice for measurement.

## Birefringence Measurements

The Birefringence of **1** was obtained through a polarizing microscope (Nikon LV1000) equipped with a Berek compensator at a wavelength of 550 nm. Small crystal was chosen for the measurement. The following formula was listed to calculate birefringence:  $R = |N_e - N_o| = \Delta n \times T$ , where  $R$  denotes the optical path difference,  $\Delta n$  represents birefringence, and  $T$  denotes the thickness of the crystal.

## Computational Methods

The first-principles calculations for **1** were performed by CASTEP<sup>5</sup> on a plane-wave pseudopotential total energy package based density functional theory (DFT).<sup>6</sup> The functional developed by Perdew-Burke-Ernzerhof (PBE) functional within the generalized gradient approximation (GGA)<sup>7-8</sup> form was adopted to describe the exchange-correlation energy. The ultrasoft pseudopotentials were used to model the effective interaction between atom cores and valence electrons. The electrons H 1s<sup>1</sup>, C 2s<sup>2</sup>2p<sup>2</sup>, N 2s<sup>2</sup>2p<sup>3</sup>, O 2s<sup>2</sup>2p<sup>4</sup> and Cd 4d<sup>10</sup>5s<sup>2</sup> are regarded as valence electrons of **1**, and the electrons H 1s<sup>1</sup>, C 2s<sup>2</sup>2p<sup>2</sup>, N 2s<sup>2</sup>2p<sup>3</sup> and O 2s<sup>2</sup>2p<sup>4</sup> are regarded as valence electrons of isoquinoline-1-carboxylic acid. The kinetic energy cut-off point of 380 eV was selected in the Brillouin zones, the dense  $1 \times 2 \times 1$  and  $2 \times 1 \times 1$  Monkhorst-Pack<sup>9</sup> k-point meshes was selected in the Brillouin zones respectively.  $3 \times 2 \times 2$  and  $2 \times 3 \times 2$  k-point meshes was selected for the calculations of density of states and optical properties respectively. The linear optical properties were examined based on the dielectric function  $\varepsilon(\omega) = \varepsilon_1(\omega) + i\varepsilon_2(\omega)$ . The imaginary part of dielectric function  $\varepsilon_2$  can be calculated based on the electronic structures and the real part is obtained by the Kramers-Kronig transformation, accordingly the refractive indices and the birefringence ( $\Delta n$ ) can be calculated. The frequency-dependent refractive index of **1** is calculated to demonstrate the validity of the birefringence measurement.

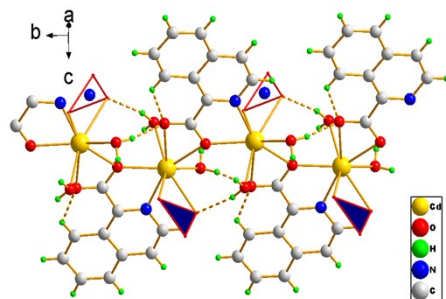

Fig. S1 Crystal structure and hydrogen bond connection of **1**.

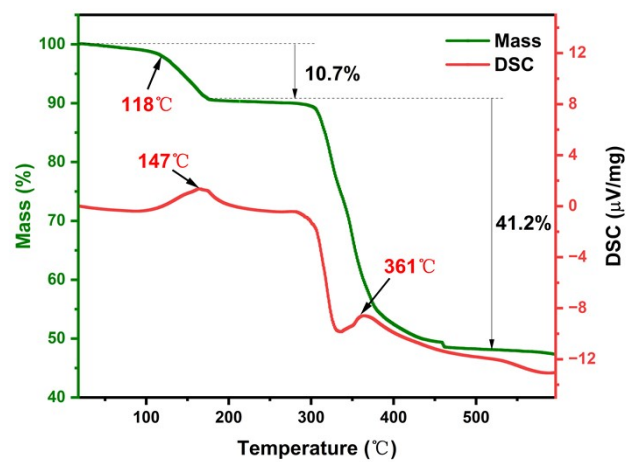

Fig. S2 Thermal stability analysis for **1**.

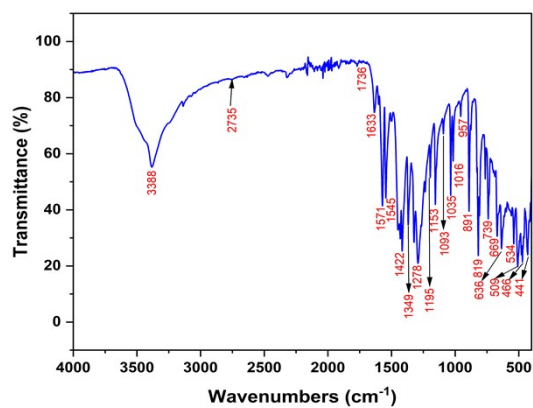

Fig. S3 Infrared spectrum of **1**.

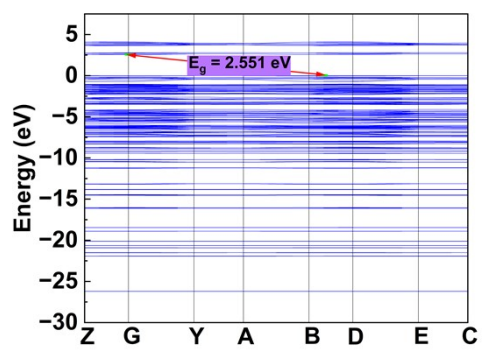

Fig. S4 Electronic band structure for 1.

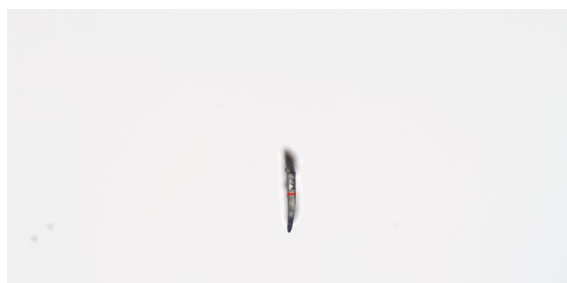

Fig. S5 The crystal thickness of 1.

**Table S1. Crystal Data and Structural Refinement for C<sub>10</sub>H<sub>6</sub>NO<sub>2</sub>Cd(NO<sub>3</sub>)·2H<sub>2</sub>O.**

| Empirical formula                                            | C <sub>10</sub> H <sub>10</sub> CdN <sub>2</sub> O <sub>7</sub>              |
|--------------------------------------------------------------|------------------------------------------------------------------------------|
| Formula weight                                               | 382.60                                                                       |
| Temperature/K                                                | 293(2)                                                                       |
| Crystal system                                               | monoclinic                                                                   |
| Space group                                                  | <i>P</i> 2 <sub>1</sub> / <i>n</i>                                           |
| <i>a</i> /Å                                                  | 11.9513(6)                                                                   |
| <i>b</i> /Å                                                  | 8.1881(3)                                                                    |
| <i>c</i> /Å                                                  | 13.4580(8)                                                                   |
| $\alpha$ /°                                                  | 90                                                                           |
| $\beta$ /°                                                   | 114.729(7)                                                                   |
| $\gamma$ /°                                                  | 90                                                                           |
| Volume/Å <sup>3</sup>                                        | 1196.21(12)                                                                  |
| <i>Z</i>                                                     | 4                                                                            |
| $\rho_{\text{calc}}/\text{cm}^3$                             | 2.124                                                                        |
| $\mu/\text{mm}^{-1}$                                         | 1.862                                                                        |
| F(000)                                                       | 752.0                                                                        |
| Crystal size/mm <sup>3</sup>                                 | 0.06 × 0.03 × 0.03                                                           |
| Radiation                                                    | Mo K $\alpha$ ( $\lambda$ = 0.71073)                                         |
| 2 $\theta$ range for data collection/°                       | 3.836 to 54.28                                                               |
| Index ranges                                                 | -14 ≤ <i>h</i> ≤ 15, -10 ≤ <i>k</i> ≤ 6, -16 ≤ <i>l</i> ≤ 16                 |
| Reflections collected                                        | 9890                                                                         |
| Independent reflections                                      | 2491 [ <i>R</i> <sub>int</sub> = 0.0533, <i>R</i> <sub>sigma</sub> = 0.0524] |
| Data/restraints/parameters                                   | 2491/14/193                                                                  |
| Goodness-of-fit on F <sup>2</sup>                            | 1.081                                                                        |
| Final <i>R</i> indexes [ <i>I</i> ≥ 2 $\sigma$ ( <i>I</i> )] | <i>R</i> <sub>1</sub> = 0.0344, <i>wR</i> <sub>2</sub> = 0.0637              |
| Final <i>R</i> indexes [all data]                            | <i>R</i> <sub>1</sub> = 0.0465, <i>wR</i> <sub>2</sub> = 0.0675              |

**Table S2. The Fractional Atomic Coordinates ( $\times 10^4$ ) and Equivalent Isotropic Displacement Parameters ( $\text{\AA}^2 \times 10^3$ ) for  $\text{C}_{10}\text{H}_6\text{NO}_2\text{Cd}(\text{NO}_3)\cdot 2\text{H}_2\text{O}$ .  $U_{\text{eq}}$  is defined as 1/3 of the trace of the orthogonalised  $U_{ij}$  tensor.**

| Atom | <i>x</i>  | <i>y</i>  | <i>z</i>  | $U_{\text{eq}}$ | BVS   |
|------|-----------|-----------|-----------|-----------------|-------|
| Cd1  | 6860.5(2) | 1063.7(3) | 2603.4(2) | 24.47(11)       | 2.058 |
| O1   | 7514(2)   | -557(3)   | 4396(2)   | 37.9(7)         |       |
| O2   | 9013(3)   | 165(5)    | 5896(3)   | 87.4(12)        |       |
| O3   | 8549(2)   | 1613(3)   | 4448(2)   | 43.0(7)         |       |
| O4   | 6395(2)   | 6246(3)   | 2982(2)   | 30.7(6)         |       |
| O5   | 6963(2)   | 3889(3)   | 2589(2)   | 30.9(6)         |       |
| O6   | 5870(2)   | 1716(3)   | 604(2)    | 36.1(6)         |       |
| O7   | 5328(2)   | -925(3)   | 1838(2)   | 32.4(6)         |       |
| N1   | 8375(3)   | 403(4)    | 4935(3)   | 36.5(8)         |       |
| N2   | 5513(2)   | 2219(3)   | 3246(2)   | 22.9(7)         |       |
| C1   | 5376(3)   | 3832(4)   | 3228(3)   | 19.4(7)         |       |
| C2   | 4473(3)   | 4596(4)   | 3505(3)   | 20.8(7)         |       |
| C3   | 4243(3)   | 6289(4)   | 3458(3)   | 31.7(9)         |       |
| C4   | 3341(3)   | 6907(5)   | 3723(3)   | 36.3(9)         |       |
| C5   | 2630(4)   | 5870(5)   | 4045(3)   | 39.7(11)        |       |
| C6   | 2816(3)   | 4244(5)   | 4108(3)   | 35.1(10)        |       |
| C7   | 3742(3)   | 3559(4)   | 3840(3)   | 25.3(8)         |       |
| C8   | 3952(3)   | 1869(5)   | 3885(3)   | 32.1(9)         |       |
| C9   | 4806(3)   | 1257(4)   | 3582(3)   | 31.1(9)         |       |
| C10  | 6287(3)   | 4731(4)   | 2908(3)   | 21.7(8)         |       |

**Table S3. Anisotropic Displacement Parameters ( $\text{\AA}^2 \times 10^3$ ) for  $\text{C}_{10}\text{H}_6\text{NO}_2\text{Cd}(\text{NO}_3)_2 \cdot 2\text{H}_2\text{O}$ . The Anisotropic displacement factor exponent takes the form:  $-2\pi^2[\text{h}^2\text{a}^2\text{U}_{11} + 2\text{hka}*\text{b}*\text{U}_{12} + \dots]$ .**

| Atom | $U_{11}$  | $U_{22}$  | $U_{33}$  | $U_{23}$  | $U_{13}$  | $U_{12}$ |
|------|-----------|-----------|-----------|-----------|-----------|----------|
| Cd1  | 26.14(17) | 20.66(16) | 31.75(18) | -2.04(11) | 17.16(13) | 1.29(11) |
| O1   | 40.6(16)  | 32.9(15)  | 40.4(16)  | -3.7(13)  | 17.3(14)  | -5.8(13) |
| O2   | 98(3)     | 94(3)     | 31.6(19)  | 5(2)      | -10.8(19) | 3(2)     |
| O3   | 40.8(16)  | 41.6(17)  | 42.8(13)  | -1.9(14)  | 13.7(10)  | -8.4(15) |
| O4   | 36.0(15)  | 18.5(13)  | 43.3(16)  | 1.8(11)   | 22.2(13)  | -5.2(12) |
| O5   | 31.8(15)  | 26.4(15)  | 46.3(17)  | 0.1(12)   | 28.1(14)  | -1.7(11) |
| O6   | 37.2(16)  | 31.5(16)  | 44.2(16)  | 3.7(14)   | 21.6(13)  | -1.8(14) |
| O7   | 33.9(15)  | 23.3(14)  | 39.9(16)  | -0.2(12)  | 15.4(13)  | -0.8(12) |
| N1   | 40(2)     | 36(2)     | 31(2)     | -5.0(17)  | 13.4(17)  | 6.7(18)  |
| N2   | 26.2(16)  | 18.1(15)  | 29.6(17)  | -3.6(13)  | 16.8(14)  | -3.8(13) |
| C1   | 24.5(18)  | 15.8(17)  | 20.3(18)  | -0.7(14)  | 11.6(15)  | -3.7(15) |
| C2   | 22.6(18)  | 20.9(18)  | 18.8(18)  | -0.9(15)  | 8.6(15)   | 2.5(16)  |
| C3   | 35(2)     | 26(2)     | 40(2)     | 0.9(17)   | 21.4(19)  | -2.6(18) |
| C4   | 36(2)     | 30(2)     | 43(2)     | -2(2)     | 16(2)     | 12(2)    |
| C5   | 31(2)     | 50(3)     | 45(3)     | -10(2)    | 22(2)     | 7(2)     |
| C6   | 30(2)     | 47(3)     | 37(2)     | -3.9(19)  | 22.3(19)  | -1.7(19) |
| C7   | 24.6(19)  | 28(2)     | 26(2)     | -1.8(16)  | 13.0(16)  | 1.0(16)  |
| C8   | 37(2)     | 26(2)     | 43(2)     | -1.2(19)  | 26(2)     | -8.4(19) |
| C9   | 40(2)     | 20.7(19)  | 41(2)     | -3.8(16)  | 25(2)     | -7.4(17) |
| C10  | 20.5(18)  | 21.8(19)  | 21.5(19)  | 4.6(15)   | 7.4(15)   | -1.7(16) |



**Table S4. Bond Lengths for C<sub>10</sub>H<sub>6</sub>NO<sub>2</sub>Cd(NO<sub>3</sub>)·2H<sub>2</sub>O.**

| Atom | Atom            | Length/Å | Atom | Atom | Length/Å |
|------|-----------------|----------|------|------|----------|
| Cd1  | O1              | 2.572(3) | N2   | C1   | 1.329(4) |
| Cd1  | O3              | 2.499(3) | N2   | C9   | 1.364(4) |
| Cd1  | O4 <sup>1</sup> | 2.523(2) | C1   | C2   | 1.425(4) |
| Cd1  | O5 <sup>1</sup> | 2.349(2) | C1   | C10  | 1.518(4) |
| Cd1  | O5              | 2.317(2) | C2   | C3   | 1.409(4) |
| Cd1  | O6              | 2.502(3) | C2   | C7   | 1.419(4) |
| Cd1  | O7              | 2.343(2) | C3   | C4   | 1.365(5) |
| Cd1  | N2              | 2.324(3) | C4   | C5   | 1.393(5) |
| O1   | N1              | 1.256(4) | C5   | C6   | 1.346(5) |
| O2   | N1              | 1.212(4) | C6   | C7   | 1.416(4) |
| O3   | N1              | 1.252(4) | C7   | C8   | 1.403(5) |
| O4   | C10             | 1.247(4) | C8   | C9   | 1.344(5) |
| O5   | C10             | 1.267(4) |      |      |          |

<sup>(1)</sup>3/2-X,-1/2+Y,1/2-Z**Table S5. Bond Angles for C<sub>10</sub>H<sub>6</sub>NO<sub>2</sub>Cd(NO<sub>3</sub>)·2H<sub>2</sub>O.**

| Atom            | Atom | Atom            | Angle/°   | Atom | Atom | Atom             | Angle/°    |
|-----------------|------|-----------------|-----------|------|------|------------------|------------|
| O3              | Cd1  | O1              | 50.13(8)  | N1   | O3   | Cd1              | 97.8(2)    |
| O3              | Cd1  | O4 <sup>1</sup> | 82.55(8)  | C10  | O4   | Cd1 <sup>2</sup> | 89.3(2)    |
| O3              | Cd1  | O6              | 148.43(9) | Cd1  | O5   | Cd1 <sup>2</sup> | 142.54(10) |
| O4 <sup>1</sup> | Cd1  | O1              | 110.95(8) | C10  | O5   | Cd1              | 119.8(2)   |
| O5              | Cd1  | O1              | 121.78(8) | C10  | O5   | Cd1 <sup>2</sup> | 96.98(19)  |
| O5 <sup>1</sup> | Cd1  | O1              | 75.61(8)  | O2   | N1   | O1               | 120.9(4)   |
| O5 <sup>1</sup> | Cd1  | O3              | 88.51(9)  | O2   | N1   | O3               | 121.2(4)   |
| O5              | Cd1  | O3              | 78.76(9)  | O3   | N1   | O1               | 118.0(3)   |
| O5 <sup>1</sup> | Cd1  | O4 <sup>1</sup> | 53.10(7)  | C1   | N2   | Cd1              | 119.8(2)   |
| O5              | Cd1  | O4 <sup>1</sup> | 83.38(7)  | C1   | N2   | C9               | 119.4(3)   |
| O5              | Cd1  | O5 <sup>1</sup> | 136.02(4) | C9   | N2   | Cd1              | 120.7(2)   |
| O5 <sup>1</sup> | Cd1  | O6              | 94.54(8)  | N2   | C1   | C2               | 122.2(3)   |
| O5              | Cd1  | O6              | 77.34(9)  | N2   | C1   | C10              | 112.9(3)   |
| O5              | Cd1  | O7              | 136.43(8) | C2   | C1   | C10              | 124.9(3)   |
| O5              | Cd1  | N2              | 69.14(8)  | C3   | C2   | C1               | 125.1(3)   |
| O6              | Cd1  | O1              | 160.07(8) | C3   | C2   | C7               | 117.9(3)   |
| O6              | Cd1  | O4 <sup>1</sup> | 74.49(8)  | C7   | C2   | C1               | 117.0(3)   |
| O7              | Cd1  | O1              | 85.90(9)  | C4   | C3   | C2               | 120.9(3)   |
| O7              | Cd1  | O3              | 136.03(9) | C3   | C4   | C5               | 120.4(4)   |

| Atom Atom Atom Angle/° |     |                 |           | Atom Atom Atom Angle/° |     |    |          |
|------------------------|-----|-----------------|-----------|------------------------|-----|----|----------|
| O7                     | Cd1 | O4 <sup>1</sup> | 120.00(8) | C6                     | C5  | C4 | 121.1(4) |
| O7                     | Cd1 | O5 <sup>1</sup> | 79.55(8)  | C5                     | C6  | C7 | 120.1(4) |
| O7                     | Cd1 | O6              | 75.18(9)  | C6                     | C7  | C2 | 119.6(3) |
| N2                     | Cd1 | O1              | 81.19(9)  | C8                     | C7  | C2 | 118.8(3) |
| N2                     | Cd1 | O3              | 87.40(9)  | C8                     | C7  | C6 | 121.6(3) |
| N2                     | Cd1 | O4 <sup>1</sup> | 152.12(8) | C9                     | C8  | C7 | 119.9(3) |
| N2                     | Cd1 | O5 <sup>1</sup> | 152.80(9) | C8                     | C9  | N2 | 122.7(3) |
| N2                     | Cd1 | O6              | 102.88(9) | O4                     | C10 | O5 | 120.6(3) |
| N2                     | Cd1 | O7              | 84.86(9)  | O4                     | C10 | C1 | 121.5(3) |
| N1                     | O1  | Cd1             | 94.1(2)   | O5                     | C10 | C1 | 117.9(3) |

<sup>(1)</sup>3/2-X,-1/2+Y,1/2-Z; <sup>(2)</sup>3/2-X,1/2+Y,1/2-Z

**Table S6. Hydrogen Bonds for C<sub>10</sub>H<sub>6</sub>NO<sub>2</sub>Cd(NO<sub>3</sub>)·2H<sub>2</sub>O.**

| D  | H   | A  | d(D-H)/Å  | d(H-A)/Å  | d(D-A)/Å | D-H-A/° |
|----|-----|----|-----------|-----------|----------|---------|
| O6 | H6A | O3 | 0.820(18) | 2.17(2)   | 2.894(4) | 147(3)  |
| O7 | H7A | O4 | 0.888(9)  | 1.918(13) | 2.778(3) | 163(3)  |
| C3 | H3  | O4 | 0.93      | 2.27      | 2.900(4) | 124.7   |

<sup>(1)</sup>-1/2+X,1/2-Y,-1/2+Z; <sup>(2)</sup>+X,-1+Y,+Z

## References

- 1 *CrysAlisPro*, Ver. 1.171.36.28; Agilent Technologies: Santa Clara, CA, 2013.
- 2 O. V. Dolomanov, L. J. Bourhis, R. J. Gildea, J. A. K. Howard and H. Puschmann, *J. Appl. Cryst.* 2009, **42**, 339.
- 3 L. J. Bourhis, O. V. Dolomanov, R. J. Gildea, J. A. K. Howard and H. Puschmann, *Acta Cryst. A*, 2015, **71**, 59.
- 4 G. M. Sheldrick, *Acta Cryst. C* 2015, **71**, 3.
- 5 S. J. Clark, M. D. Segall, C. J. Pickard, P. J. Hasnip, M. J. Probert, K. Refson and M. C. Payne, *Z. Kristallogr. - Cryst. Mater.* 2005, **220**, 567.
- 6 M. C. Payne, M. P. Teter, D. C. Allan, T. A. Arias and J. D. Joannopoulos, *Rev. Mod. Phys.* 1992, **64**, 1045.
- 7 D. M. Ceperley and B. J. Alder, *Phys. Rev.*, 1980, **45**, 566.
- 8 J. P. Perdew and A. Zunger, *Phys. Rev. B*, 1981, **23**, 5048.
- 9 H. J. Monkhorst and J. D. Pack, *Phys. Rev. B* 1976, **13**, 5188.
